# Supplementary material for: Where Is My Mind…? The Link between Mind Wandering and Prospective Memory
Source: MDPI journal article supplement (doi:10.3390/brainsci12091139), 2022-08-26
Supplement: s1 [file s1]

|                          |                          | Mean Difference       | 95% CI for Mean Difference |           | SE     | t          | Pbonf  |
|--------------------------|--------------------------|-----------------------|----------------------------|-----------|--------|------------|--------|
|                          |                          |                       | Lower                      | Upper     |        |            |        |
| Spontaneous, EFT         | External, EFT            | 0.009                 | −0.005                     | 0.022     | 0.004  | 2.194      | 1.000  |
|                          | Voluntary, EFT           | 0.013                 | −5.671e −4                 | 0.026     | 0.004  | 3.232      | 0.083  |
|                          | Spontaneous, Planning    | −0.022                | −0.034                     | −0.009    | 0.004  | −5.829     | < .001 |
|                          | External, Planning       | −0.018                | −0.032                     | −0.005    | 0.004  | −4.517     | < .001 |
|                          | Voluntary, Planning      | −0.035                | −0.048                     | −0.021    | 0.004  | −8.587     | < .001 |
|                          | Spontaneous, Past        | 0.016                 | 0.003                      | 0.028     | 0.004  | 4.246      | 0.001  |
|                          | External, Past           | 0.020                 | 0.007                      | 0.034     | 0.004  | 5.026      | < .001 |
|                          | Voluntary, Past          | 0.025                 | 0.011                      | 0.038     | 0.004  | 6.109      | < .001 |
|                          | Spontaneous, Imagination | 0.016                 | 0.003                      | 0.028     | 0.004  | 4.246      | 0.001  |
|                          | External, Imagination    | 0.020                 | 0.007                      | 0.034     | 0.004  | 5.026      | < .001 |
|                          | Voluntary, Imagination   | 0.025                 | 0.011                      | 0.038     | 0.004  | 6.109      | < .001 |
| External, EFT            | Voluntary, EFT           | 0.004                 | −0.009                     | 0.018     | 0.004  | 1.038      | 1.000  |
|                          | Spontaneous, Planning    | −0.030                | −0.044                     | −0.017    | 0.004  | −7.525     | < .001 |
|                          | External, Planning       | −0.027                | −0.039                     | −0.014    | 0.004  | −7.291     | < .001 |
|                          | Voluntary, Planning      | −0.043                | −0.057                     | −0.030    | 0.004  | −10.762    | < .001 |
|                          | Spontaneous, Past        | 0.007                 | −0.007                     | 0.021     | 0.004  | 1.723      | 1.000  |
|                          | External, Past           | 0.011                 | −9.877e −4                 | 0.024     | 0.004  | 3.106      | 0.127  |
|                          | Voluntary, Past          | 0.016                 | 0.002                      | 0.029     | 0.004  | 3.934      | 0.006  |
|                          | Spontaneous, Imagination | 0.007                 | −0.007                     | 0.021     | 0.004  | 1.723      | 1.000  |
|                          | External, Imagination    | 0.011                 | −9.877e −4                 | 0.024     | 0.004  | 3.106      | 0.127  |
|                          | Voluntary, Imagination   | 0.016                 | 0.002                      | 0.029     | 0.004  | 3.934      | 0.006  |
|                          | Voluntary, EFT           | Spontaneous, Planning | −0.034                     | −0.048    | −0.021 | 0.004      | −8.554 |
| External, Planning       |                          | −0.031                | −0.045                     | −0.018    | 0.004  | −7.721     | < .001 |
| Voluntary, Planning      |                          | −0.048                | −0.060                     | −0.035    | 0.004  | −12.845    | < .001 |
| Spontaneous, Past        |                          | 0.003                 | −0.011                     | 0.016     | 0.004  | 0.694      | 1.000  |
| External, Past           |                          | 0.007                 | −0.006                     | 0.021     | 0.004  | 1.822      | 1.000  |
| Voluntary, Past          |                          | 0.012                 | −7.683e −4                 | 0.024     | 0.004  | 3.165      | 0.104  |
| Spontaneous, Imagination |                          | 0.003                 | −0.011                     | 0.016     | 0.004  | 0.694      | 1.000  |
| External, Imagination    |                          | 0.007                 | −0.006                     | 0.021     | 0.004  | 1.822      | 1.000  |
| Voluntary, Imagination   |                          | 0.012                 | −7.683e −4                 | 0.024     | 0.004  | 3.165      | 0.104  |
| Spontaneous, Planning    | External, Planning       | 0.003                 | −0.010                     | 0.017     | 0.004  | 0.840      | 1.000  |
|                          | Voluntary, Planning      | −0.013                | −0.027                     | 4.316e −4 | 0.004  | −3.266     | 0.073  |
|                          | Spontaneous, Past        | 0.037                 | 0.025                      | 0.050     | 0.004  | 10.075     | < .001 |
|                          | External, Past           | 0.042                 | 0.028                      | 0.055     | 0.004  | 10.376     | < .001 |
|                          | Voluntary, Past          | 0.046                 | 0.033                      | 0.060     | 0.004  | 11.459     | < .001 |
|                          | Spontaneous, Imagination | 0.037                 | 0.025                      | 0.050     | 0.004  | 10.075     | < .001 |
|                          | External, Imagination    | 0.042                 | 0.028                      | 0.055     | 0.004  | 10.376     | < .001 |
|                          | Voluntary, Imagination   | 0.046                 | 0.033                      | 0.060     | 0.004  | 11.459     | < .001 |
| External, Planning       | Voluntary, Planning      | −0.016                | −0.030                     | −0.003    | 0.004  | −4.106     | 0.003  |
|                          | Spontaneous, Past        | 0.034                 | 0.020                      | 0.048     | 0.004  | 8.415      | < .001 |
|                          | External, Past           | 0.038                 | 0.026                      | 0.051     | 0.004  | 10.397     | < .001 |
|                          | Voluntary, Past          | 0.043                 | 0.029                      | 0.056     | 0.004  | 10.626     | < .001 |
|                          | Spontaneous, Imagination | 0.034                 | 0.020                      | 0.048     | 0.004  | 8.415      | < .001 |
|                          | External, Imagination    | 0.038                 | 0.026                      | 0.051     | 0.004  | 10.397     | < .001 |
|                          | Voluntary, Imagination   | 0.043                 | 0.029                      | 0.056     | 0.004  | 10.626     | < .001 |
| Voluntary, Planning      | Spontaneous, Past        | 0.050                 | 0.037                      | 0.064     | 0.004  | 12.485     | < .001 |
|                          | External, Past           | 0.055                 | 0.041                      | 0.068     | 0.004  | 13.613     | < .001 |
|                          | Voluntary, Past          | 0.059                 | 0.047                      | 0.072     | 0.004  | 16.011     | < .001 |
|                          | Spontaneous, Imagination | 0.050                 | 0.037                      | 0.064     | 0.004  | 12.485     | < .001 |
|                          | External, Imagination    | 0.055                 | 0.041                      | 0.068     | 0.004  | 13.613     | < .001 |
|                          | Voluntary, Imagination   | 0.059                 | 0.047                      | 0.072     | 0.004  | 16.011     | < .001 |
| Spontaneous, Past        | External, Past           | 0.005                 | −0.009                     | 0.018     | 0.004  | 1.138      | 1.000  |
|                          | Voluntary, Past          | 0.009                 | −0.005                     | 0.022     | 0.004  | 2.231      | 1.000  |
|                          | Spontaneous, Imagination | 6.282e −16            | −0.012                     | 0.012     | 0.004  | 1.697e −13 | 1.000  |
|                          | External, Imagination    | 0.005                 | −0.009                     | 0.018     | 0.004  | 1.128      | 1.000  |
|                          | Voluntary, Imagination   | 0.009                 | −0.005                     | 0.023     | 0.004  | 2.211      | 1.000  |
| External, Past           | Voluntary, Past          | 0.004                 | −0.009                     | 0.018     | 0.004  | 1.093      | 1.000  |
|                          | Spontaneous, Imagination | −0.005                | −0.018                     | 0.009     | 0.004  | −1.128     | 1.000  |
|                          | External, Imagination    | 3.381e −16            | −0.012                     | 0.012     | 0.004  | 9.134e −14 | 1.000  |
|                          | Voluntary, Imagination   | 0.004                 | −0.009                     | 0.018     | 0.004  | 1.083      | 1.000  |
| Voluntary, Past          | Spontaneous, Imagination | −0.009                | −0.023                     | 0.005     | 0.004  | −2.211     | 1.000  |
|                          | External, Imagination    | −0.004                | −0.018                     | 0.009     | 0.004  | −1.083     | 1.000  |

*Note.* P-value and confidence intervals adjusted for comparing a family of 66 estimates (confidence intervals corrected using the bonferroni method).

|                          |                        | 95% CI for Mean Difference |        |       |       |             |                   |
|--------------------------|------------------------|----------------------------|--------|-------|-------|-------------|-------------------|
|                          |                        | Mean Difference            | Lower  | Upper | SE    | t           | P <sub>bonf</sub> |
|                          | Voluntary, Imagination | 2.275e – 16                | –0.012 | 0.012 | 0.004 | 6.146e – 14 | 1.000             |
| Spontaneous, Imagination | External, Imagination  | 0.005                      | –0.009 | 0.018 | 0.004 | 1.138       | 1.000             |
|                          | Voluntary, Imagination | 0.009                      | –0.005 | 0.022 | 0.004 | 2.231       | 1.000             |
| External, Imagination    | Voluntary, Imagination | 0.004                      | –0.009 | 0.018 | 0.004 | 1.093       | 1.000             |

*Note.* P-value and confidence intervals adjusted for comparing a family of 66 estimates (confidence intervals corrected using the bonferroni method).
